# Supplementary material for: A novel molecularly imprinted polymer on CdSe/ZnS quantum dots for highly selective optosensing of mycotoxin zearalenone in cereal samples
Source: Royal Society of Chemistry journal article supplement (doi:10.1039/c3ra45172k), 2013-11-26
Supplement: c3ra45172k.pdf [file c3ra45172k.pdf]

**A novel molecularly imprinted polymer on CdSe/ZnS  
quantum dots for highly selective optosensing of mycotoxin  
Zearalenone in cereal samples**

Guozhen Fang, Chao Fan, Huiling Liu, Mingfei Pan, Huidan Zhu and Shuo Wang\*

Key Laboratory of Food Nutrition and Safety, Ministry of Education, Tianjin Key

Laboratory of Food Nutrition and Safety, Tianjin University of Science and

Technology, Tianjin 300457, China

\*Corresponding author: Shuo Wang

Tel: (+86 22) 60601430

Fax: (+86 22) 60601332

E-mail: [s.wang@tust.edu.cn](mailto:s.wang@tust.edu.cn)

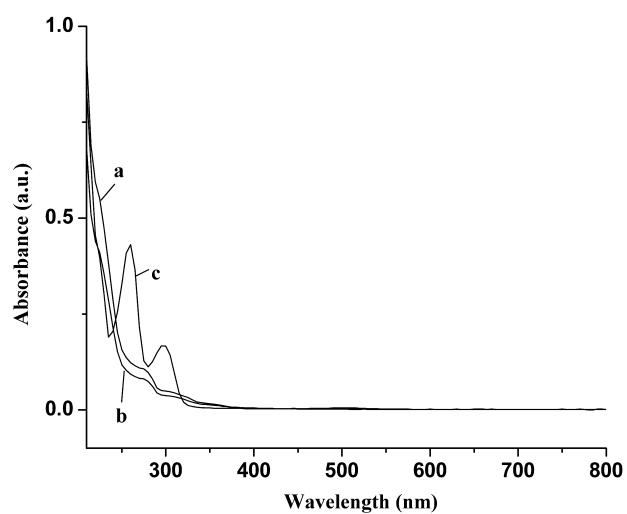

Fig.S1 UV-vis spectra of the extracts from Soxhlet Extraction of MIOM (a) and NIOM (b), and UV-vis spectra of CDHB (c).

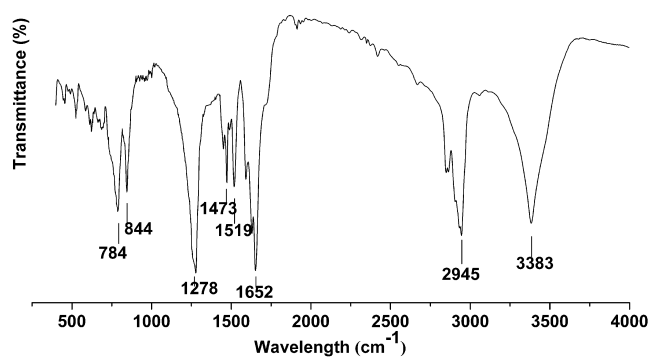

Fig. S2. FT-IR spectra of CDHB

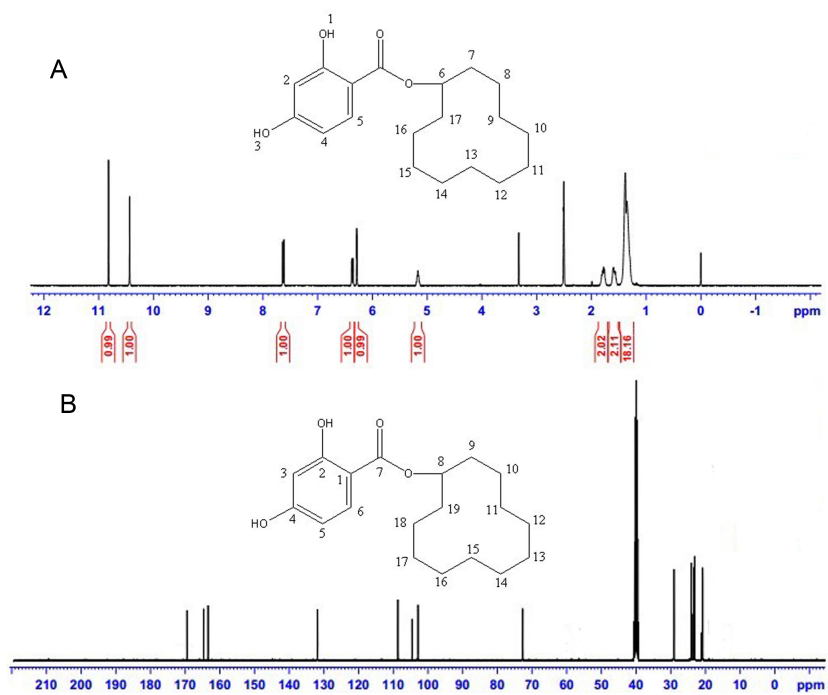

Fig. S3. <sup>1</sup>H NMR spectra (A) and <sup>13</sup>C NMR spectra (B) of CDHB

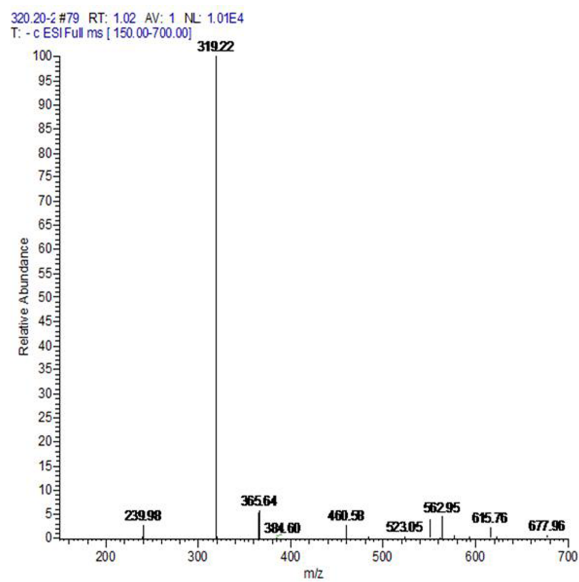

Fig. S4. Negative ion mass spectra of CDHB

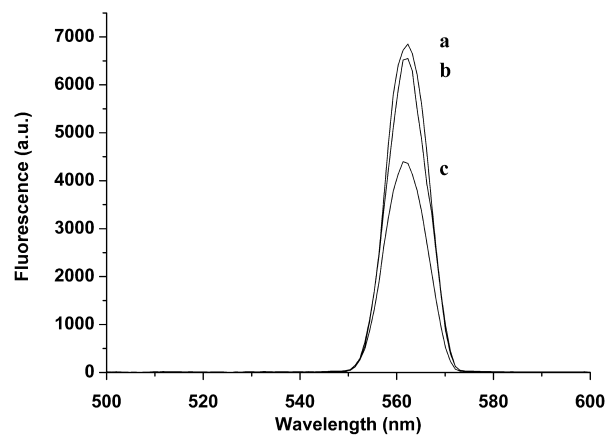

Fig. S5. Fluorescence emission spectra of NIOM (a), MIOM before (c) and after (b) template extraction

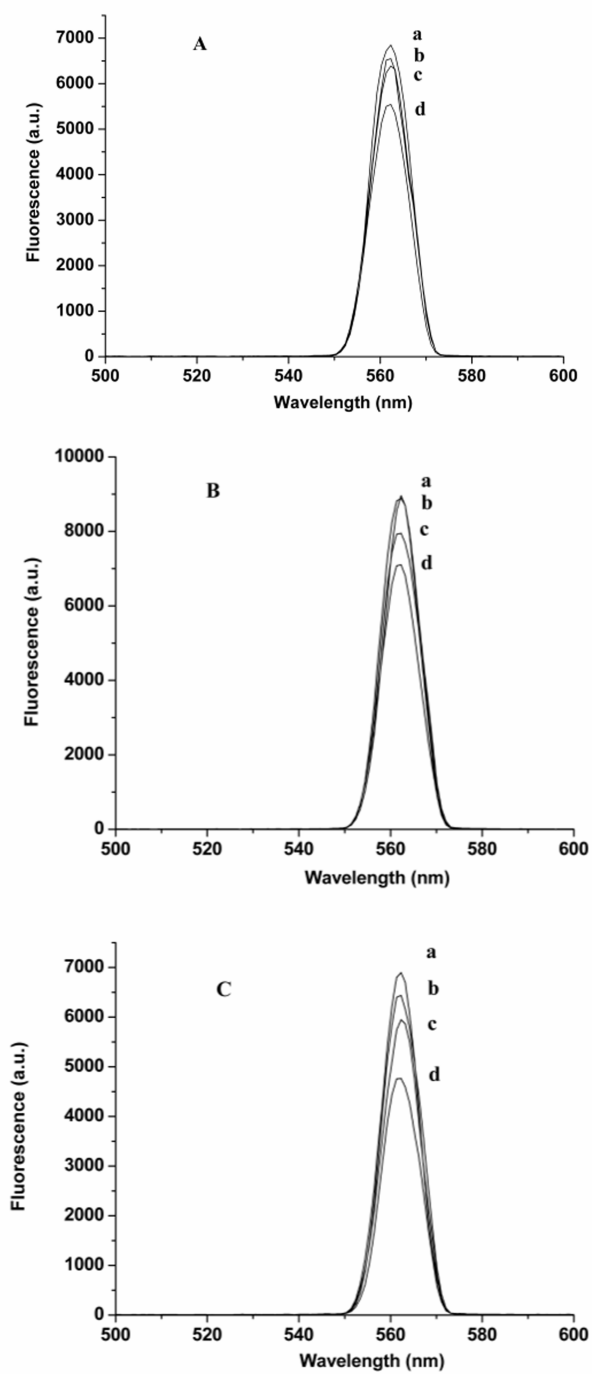

Fig. S6. Fluorescence emission spectra of MIOM (b), NIOM (a), MIOM with addition of  $1.56 \mu\text{mol L}^{-1}$  CDHB (d) and NIOM with addition of  $1.56 \mu\text{mol L}^{-1}$  CDHB (c) in acetonitrile(A), methanol (B) and ethanol (C), separately.
